# Supplementary material
Source: publisher site journal article supplement (https://www.dovepress.com/article/506569)
Supplement: Supplementary file 1 [file get_supplementary_file.php]

Supplementary Table 1 : Real-time Polymerase Chain Reaction (PCR) Primers

| Genes | Forward primer (5′ to 3′) | Reverse Primer (5′ to 3′) |
| --- | --- | --- |
| *NLRP3* | CGGGTTTCAACGCCGACTA | TTGGCACTAGAGACGGACAGA |
| *IL-1β* | GAAATGCCACCTTTTGACAGTG | TGGATGCTCTCATCAGGACAG |
| *IL-18* | ATATCGACCGAACAGCCAAC | TTCCATCCTTCACAGATAGGG |
| *β-actin* | TGTTACCAACTGGGACGACGACA | CTGGGTCATCTTTTCACGGT |

**
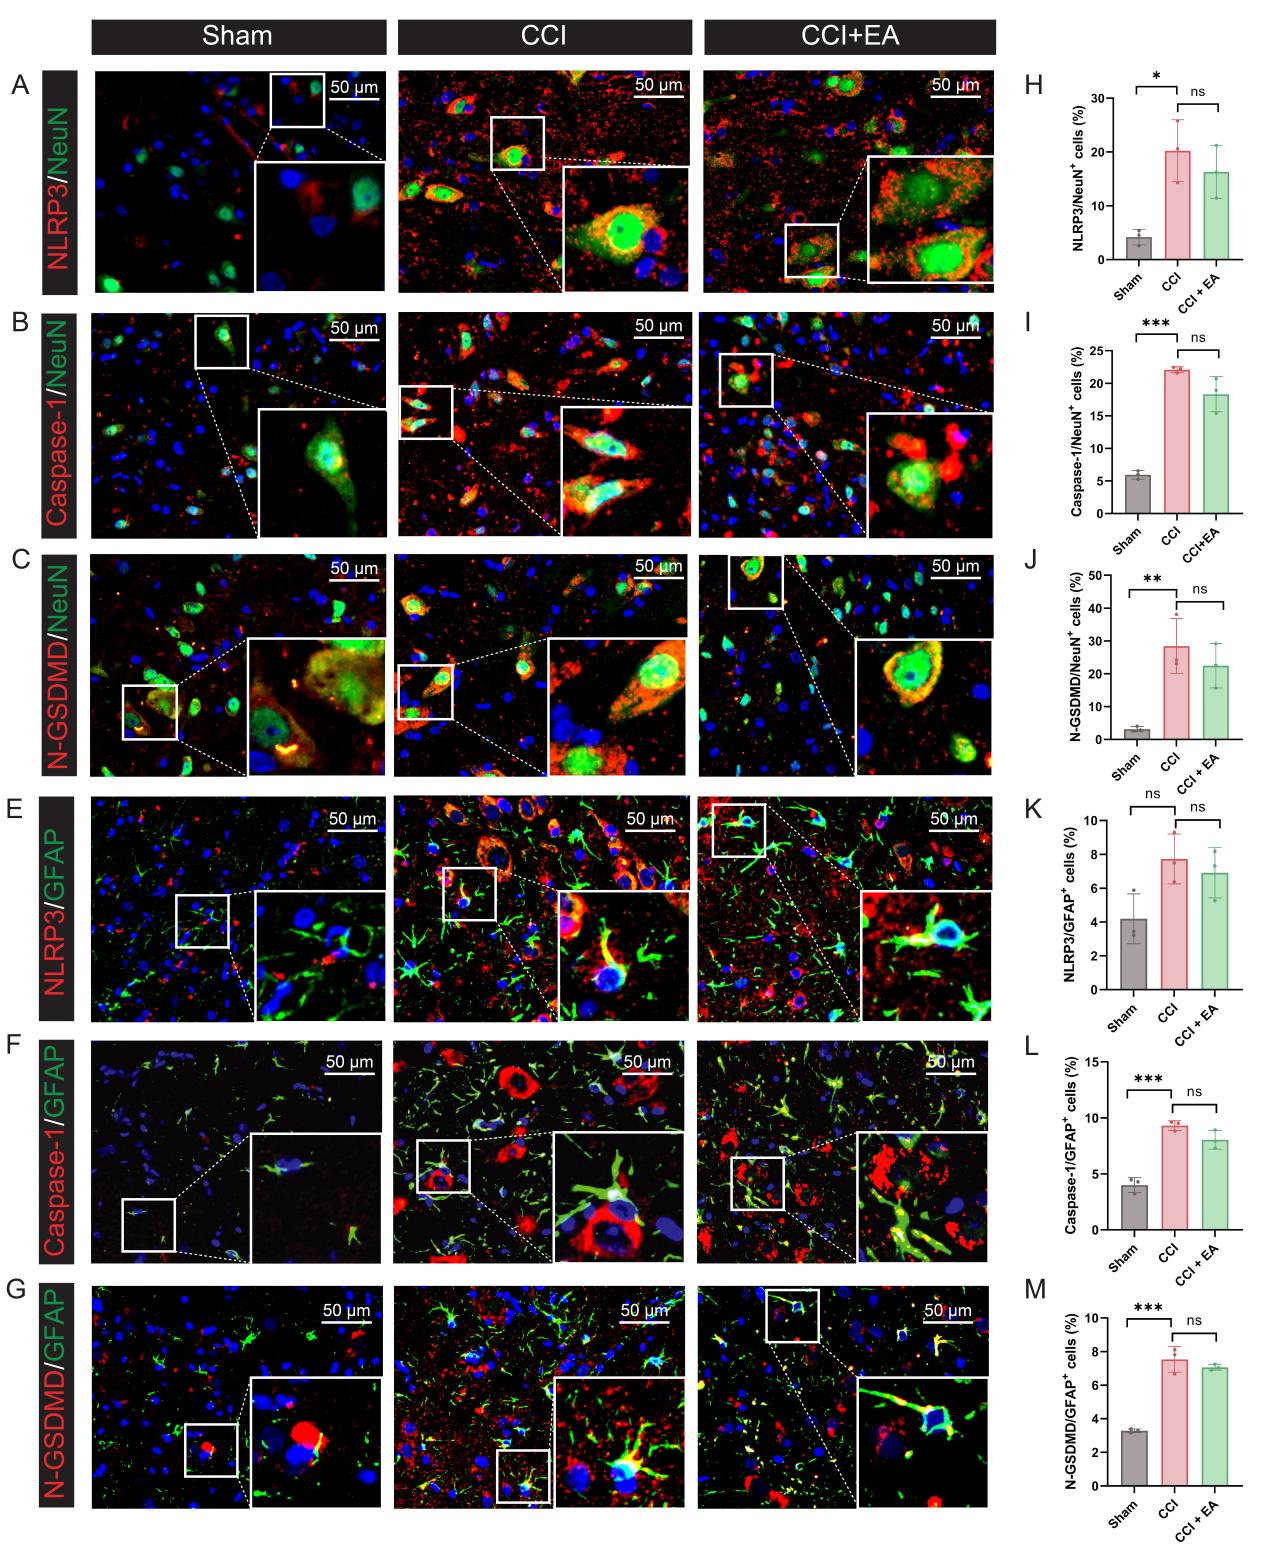
**

Supplementary Figure 1 EA failed to inhibit the pyroptosis in neurons and astrocyte following CCI operation. (**A**) Representative images of immunofluorescent analysis of NeuN+ (green), NLRP3+ (red) maker, and DAPI (blue) staining of nuclei in the spinal cord dorsal horn among groups. Scale bars, 50 μm. (**B**) Representative images of immunofluorescent analysis of NeuN+ (green), Caspase-1+ (red) maker, and DAPI (blue) staining of nuclei in the spinal cord dorsal horn among groups. Scale bars, 50 μm. (**C**) Representative images of immunofluorescent analysis of NeuN+ (green), N-GSDMD+ (red) maker, and DAPI (blue) staining of nuclei in the spinal cord dorsal horn among groups. Scale bars, 50 μm. (**D**)Representative images of immunofluorescent analysis of GFAP+ (green), NLRP3+ (red) maker, and DAPI (blue) staining of nuclei in the spinal cord dorsal horn among groups. Scale bars, 50 μm. (**E**) Representative images of immunofluorescent analysis of GFAP+ (green), Caspase-1+ (red) maker, and DAPI (blue) staining of nuclei in the spinal cord dorsal horn among groups. Scale bars, 50 μm. (**F**) Representative images of immunofluorescent analysis of GFAP+ (green), N-GSDMD+ (red) maker, and DAPI (blue) staining of nuclei in the spinal cord dorsal horn among groups. Scale bars, 50 μm. Quantification analysis the number of NLRP3/NeuN+ (**G**), Caspase-1/NeuN+ (**H**), N-GSDMD/NeuN+ (**I**), NLRP3/GFAP+ (**J**), Caspase-1/GFAP+ (**K**) and N-GSDMD/GFAP+ (**L**) in the spinal cord dorsal horn. Data presented as means ± s.d. **P* < 0.05, ***P* < 0.01, ****P* < 0.001, n = 3.
